# Supplementary material
Source: HighWire-hosted journal article supplement (https://www.life-science-alliance.org/content/5/8/e202101209/F3)

Raw images of immunoblots in Fig 3B

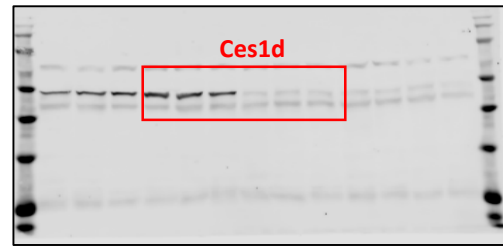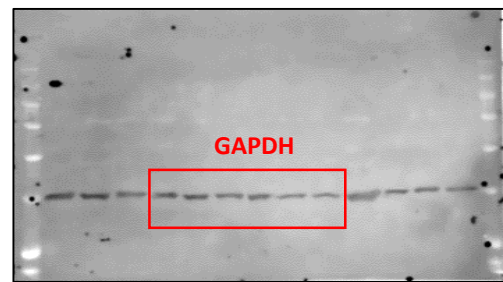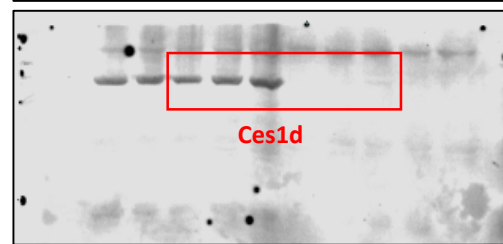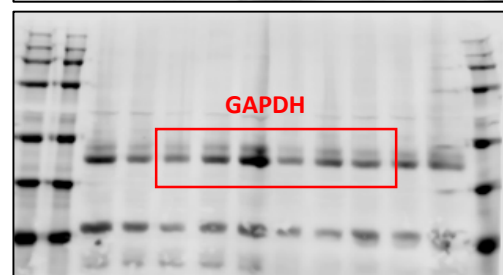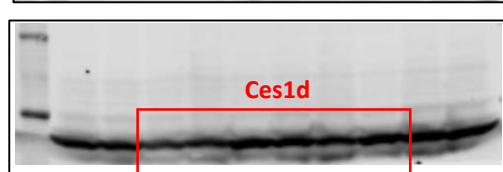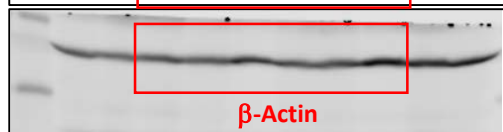

Supplement: inline-supplementary-material-2 [file inline-supplementary-material-2.pdf]
